# Supplementary material
Source: PubMed Central journal article supplement (PMC2903358)

## Supplemental Data to Mandal et al.

### System $x_C^-$ and Thioredoxin Reductase 1 Cooperatively Rescue Glutathione Deficiency

Pankaj Kumar Mandal<sup>1\*</sup>, Alexander Seiler<sup>1\*</sup>, Tamara Perisic<sup>1\*</sup>, Pirkko Kölle<sup>2</sup>, Ana Banjac Canak<sup>1</sup>, Heidi Förster<sup>1</sup>, Norbert Weiss<sup>2</sup>, Elisabeth Kremmer<sup>3</sup>, Michael W. Lieberman<sup>4</sup>, Shiro Bannai<sup>5</sup>, Peter Kuhlencordt<sup>2</sup>, Hideyo Sato<sup>5</sup>, Georg W. Bornkamm<sup>1</sup>, and Marcus Conrad<sup>1#</sup>

#### Figure S1. Stable Expression of xCT in $\gamma$ -GCS<sup>-/-</sup> Cells.

(A) As reported previously, intracellular GSH was not detectable in  $\gamma$ -GCS<sup>-/-</sup> cells by HPLC analysis. *E14 2 $\alpha$ TG* wild-type embryonic stem cells were used as a positive control.

(B) Proliferation of  $\gamma$ -GCS<sup>-/-</sup> cells was dependent on NAC (5 mM) or GSH (2.5 mM) supplementation.

(C) Northern blot analysis revealed strong hybridisation signals of the bicistronic 2.7 kb xCT-IRES-puromycin acetyltransferase mRNA in xCT-transfected (xCT-5 and xCT-7), but not in mock- and eGFP-transfected cells.

(D) Quantitative RT-PCR analysis detected xCT expression in clone xCT-5 and xCT-7 with crossing points at 21.54 and 23.02 cycles, respectively. xCT-5 had approximately 8-fold higher xCT expression levels than clone xCT-7 (compare Northern blot). In contrast, no xCT signals were detected even after 50 amplification cycles in control cell lines, indicating that xCT expression is virtually absent in these cells.

**Figure S2. xCT-Expressing Cells were Equally Resistant to Pro-oxidants and Genotoxic Agents as GSH-Supplemented Cells.**

(A-D) Cells were treated with various pro-oxidants and genotoxic agents as indicated. The number of viable cells was determined 48 h after treatment by trypan blue exclusion. Error bars indicate mean  $\pm$  SD.

**Figure S3. xCT-Expressing Cells are Fully Resistant to Chemical Inhibition of  $\gamma$ -GCS.**

(A) NAC-supplemented eGFP-transfected cells and non-supplemented xCT-transfected  $\gamma$ -GCS<sup>-/-</sup> cells were treated with high concentrations of BSO for 72 h and the number of viable cells was determined by trypan blue exclusion. Error bars indicate mean  $\pm$  SD.

(B) Phase contrast microscopy of eGFP-transfected  $\gamma$ -GCS<sup>-/-</sup> cells in the presence of NAC treated for 10 passages with 1 mM BSO.

**Figure S4. Antioxidant Supplementation Fails to Rescue *Txnrd1*<sup>-/-</sup> Cells from BSO-Induced Cell Death.**

Cells were treated with BSO either in the presence or absence of antioxidant supplements for 24 h and then stained with Annexin V and PI and analyzed by flow cytometry. The tested antioxidants were able to rescue *Txnrd1*<sup>+/-</sup> control cells (18.7% Annexin V-PI positive cells in case of BSO alone v/s 1.8% with NAC, 4.3% with Trolox<sup>®</sup> and 4.0% with 2-ME), but were ineffective in preventing BSO-induced cell death in *Txnrd1*<sup>-/-</sup> cells (lower panel). The experiment was repeated with another *Txnrd1*<sup>-/-</sup> cell line with similar results. Pooled data from two independent experiments is represented in percentage (mean $\pm$ SD).

Figure S1

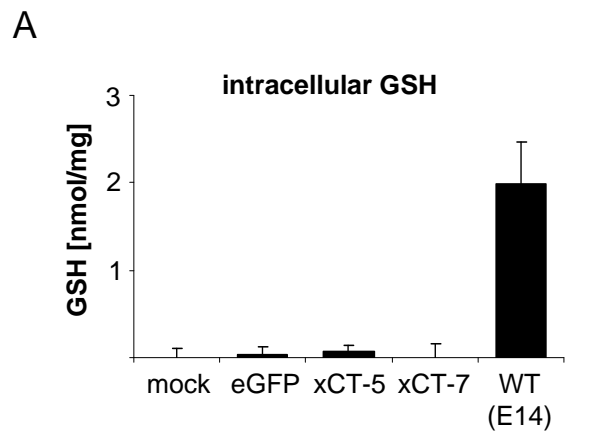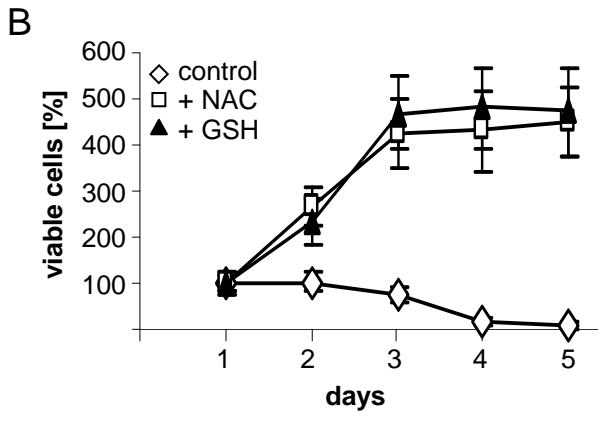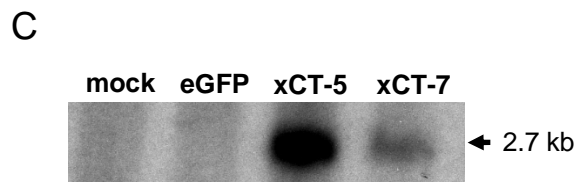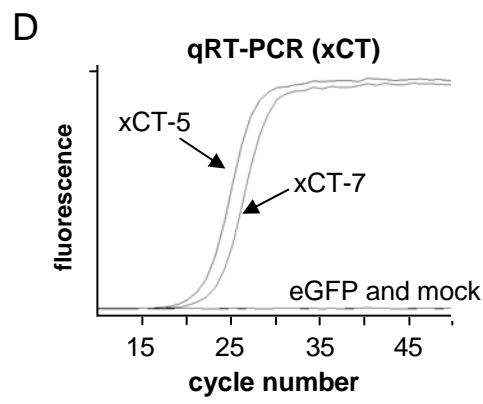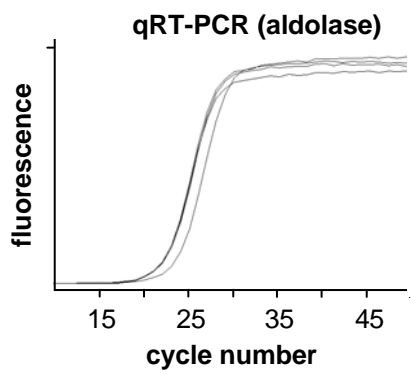

Figure S2

A

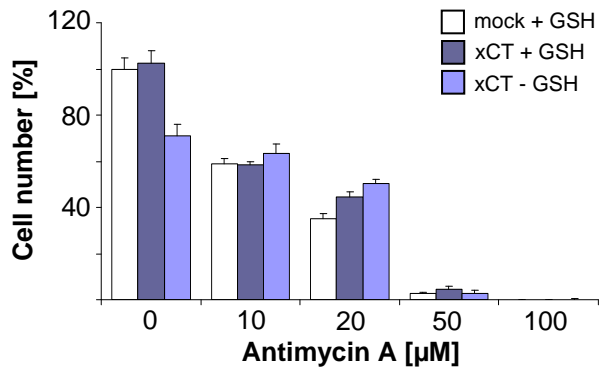

B

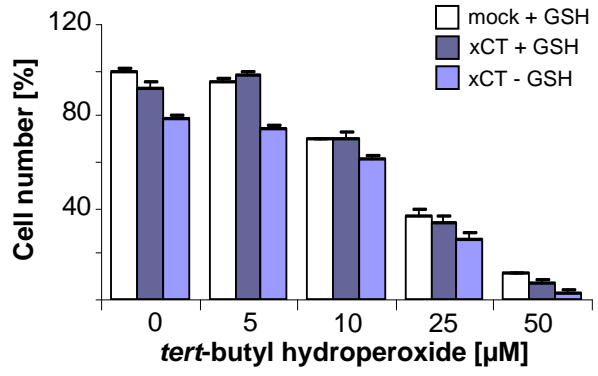

C

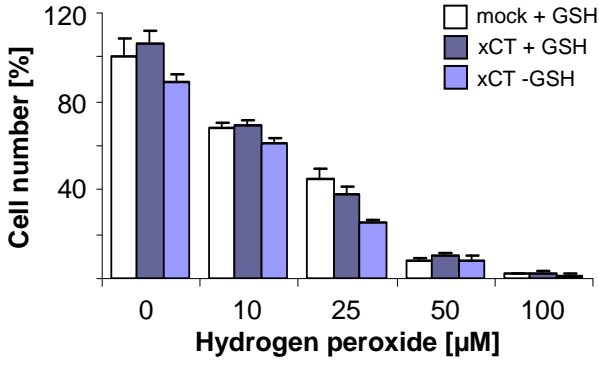

D

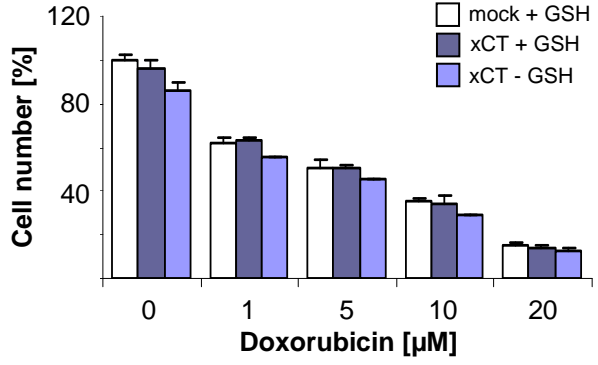

Figure S3

A

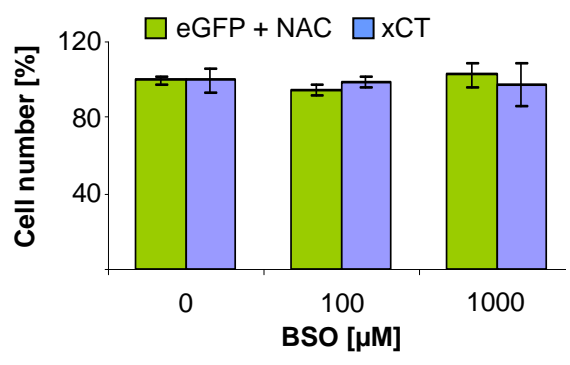

B

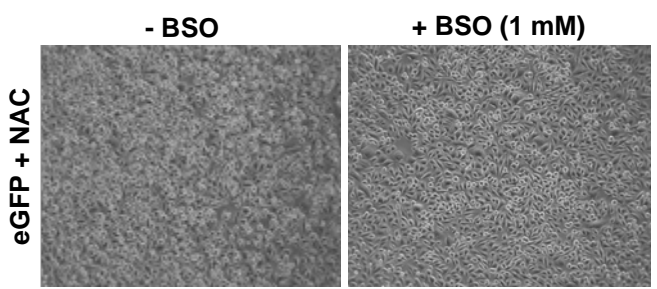

Figure S4

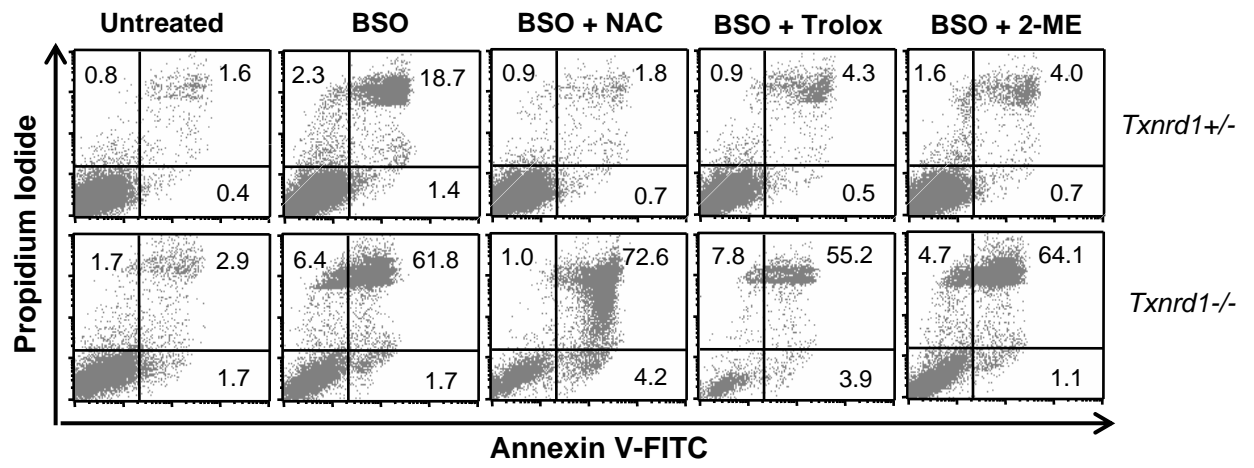

Supplement: supp_M110.121327_jbc.M110.121327-1.pdf [file supp_M110.121327_jbc.M110.121327-1.pdf]
